# Supplementary material for: Identification of the gene altered in Berardinelli–Seip congenital lipodystrophy on chromosome 11q13
Source: Springer Nature journal article supplement (doi:10.1038/ng585), 2001-07-23
Supplement: ng585-S1.pdf [file ng585-S1.pdf]

Table A ● *GNG3LG* intron-exon boundaries

| Exon | Size<br>(bp) | 3 splice site                       | 5 splice site                      |
|------|--------------|-------------------------------------|------------------------------------|
| 1    | ND           |                                     | CAAAGAGGAG <b>gt</b> aggggccccttg  |
| 2    | 317          | accctctctttcc <b>ag</b> GAACCACCAG  | TCTACTACAG <b>gt</b> gagaggggccttc |
| 3    | 82           | tccaatctcattt <b>ag</b> GACCGACTGT  | ACGTGATCGG <b>gt</b> gagtatgggaact |
| 4    | 144          | ggctacctttggc <b>ag</b> GTGCTGATGT  | TTCGCGTTCG <b>gt</b> aagtgttggtggc |
| 5    | 135          | tcccacccccggc <b>ag</b> GTGATGCTGC  | AGAGAACTCG <b>gt</b> gagtgaggtgaac |
| 6    | 98           | cccacccctcac <b>ag</b> TACGTGCCGA   | CTGGGCTCAG <b>gt</b> gaggggccaactg |
| 7    | 142          | tacttcctgcctc <b>ag</b> ATACCTGCTA  | CTCTTTGCAG <b>gt</b> cgaaggggcaag  |
| 8    | 67           | gttttctccac <b>ag</b> GTTAACATCC    | CATCAGCCAG <b>gt</b> aaaggtgttgct  |
| 9    | 81           | tctttggaggtgc <b>ag</b> GGCCTGAAGG  | TCAGGGACAG <b>gt</b> atggcgcagccac |
| 10   | 81           | cccttttggtgc <b>ag</b> AGGGTCAGCT   | GCCAGTGATG <b>gt</b> gaggggcatcctg |
| 11   | >155         | cctttcctggccc <b>ag</b> GTTTCAGGCTC |                                    |
